# Supplementary material for: Functional characterization of IRESes by an inhibitor of the RNA helicase eIF4A
Source: Springer Nature journal article supplement (doi:10.1038/nchembio776), 2006-03-12
Supplement: nchembio776-S3.pdf [file nchembio776-S3.pdf]

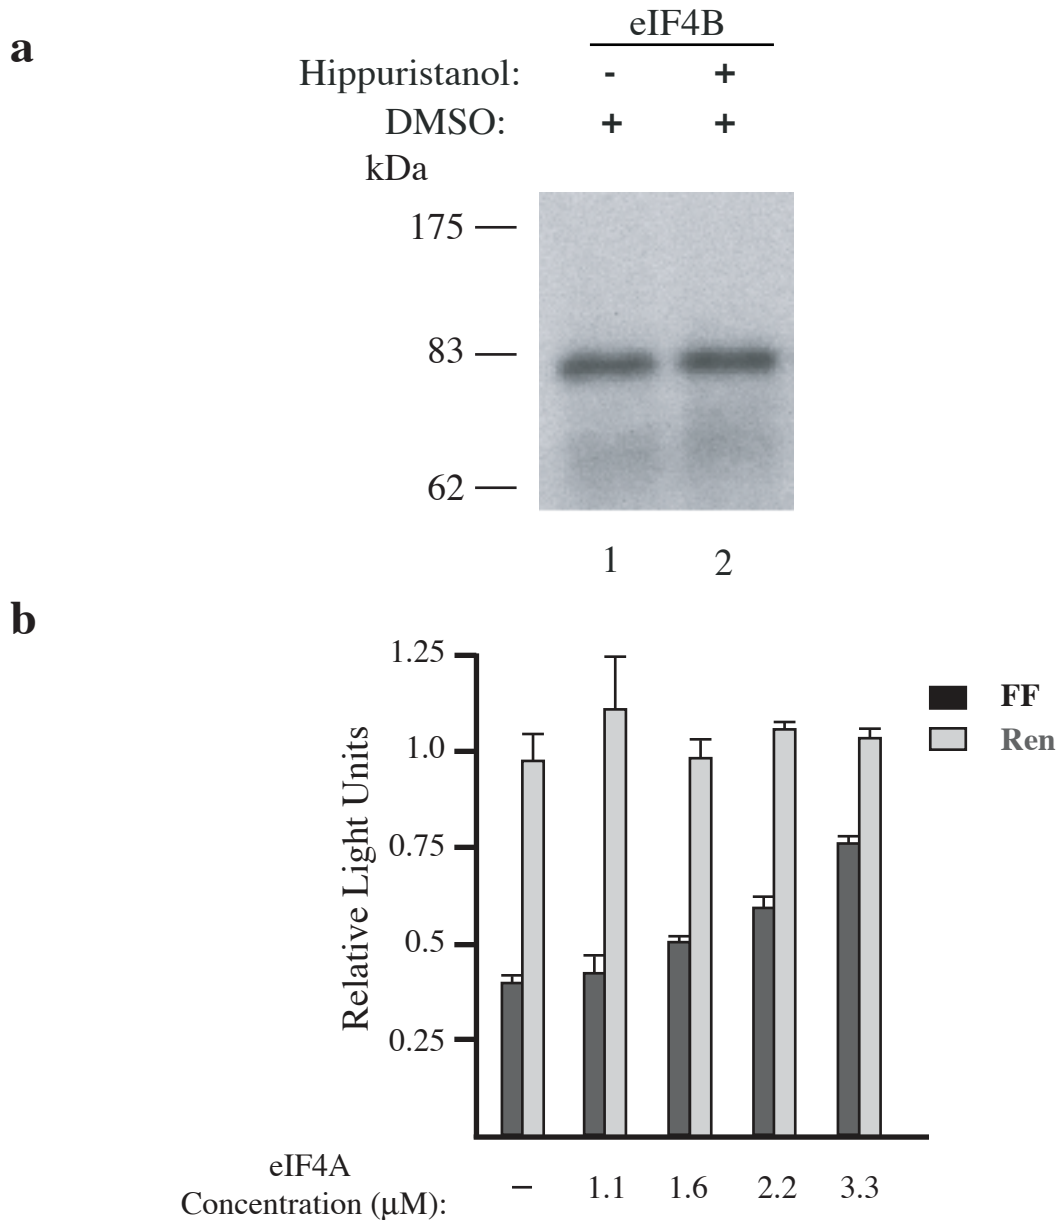

**Figure S3. a.** Hippuristanol does not inhibit crosslinking of eIF4B to RNA. Recombinant eIF4B was chemically crosslinked to  $^{32}\text{P}$  cap-labeled mRNA in the presence of 0.5% DMSO (lane 1) or 50  $\mu\text{M}$  hippuristanol (lanes 2). Following nuclease digestion, samples were resolved by SDS-PAGE and the dried gel subjected to autoradiography. **b.** Dose-dependent rescue of hippuristanol-induced inhibition of translation by recombinant eIF4A<sub>f</sub>. *In vitro* translations were performed in Krebs-2 extracts programmed with FF/HCV/Ren mRNA in the presence of 0.4  $\mu\text{M}$  hippuristanol and the indicated amounts of recombinant eIF4A<sub>f</sub>. Following *in vitro* translations, firefly and renilla luciferase production was determined and the values calculated relative to those obtained in parallel reactions that contained 0.004% DMSO. Values are the average of two experiments with the standard error of the mean shown. Note that the batches of eIF4A<sub>f</sub> and Krebs-2 extract used in this rescue experiment differ from the ones used in Fig. 4c and this likely is responsible for observed differences in eIF4A<sub>f</sub> concentration required to rescue hippuristanol-induced inhibition between the two experiments.
