# Supplementary material for: Functional characterization of IRESes by an inhibitor of the RNA helicase eIF4A
Source: Springer Nature journal article supplement (doi:10.1038/nchembio776), 2006-03-12
Supplement: nchembio776-S5.pdf [file nchembio776-S5.pdf]

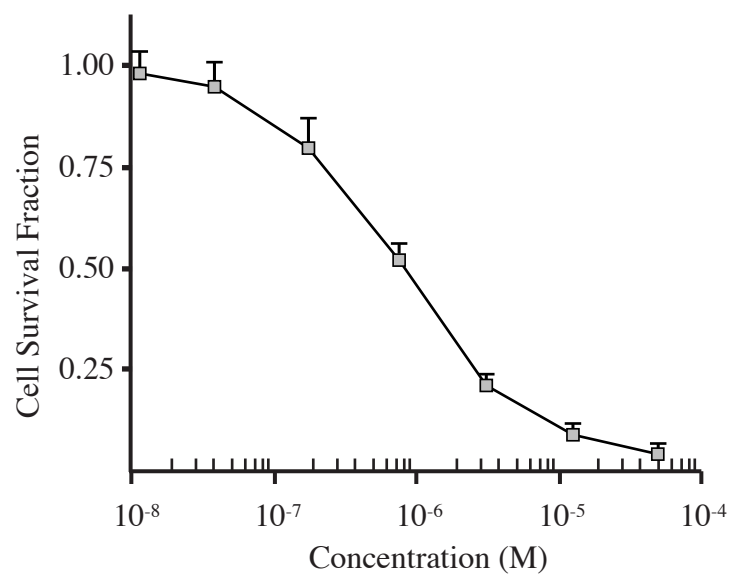

**Figure S5.** Determination of the IC<sub>50</sub> for hippuristanol on HeLa cell proliferation. HeLa cells were incubated with the indicated concentrations of hippuristanol for 24 hrs and the number of cells was determined by fixing (10% TCA) and staining total cell protein with sulforhodamine (SRB). The values are expressed relative to vehicle (0.5% DMSO) controls and each data point represents the average of four independent experiments with the standard error of the mean presented.
